# Supplementary material for: How do Cl concentrations matter for the simulation of CH 4 and δ 13 C(CH 4 ) and estimation of the CH 4 budget through atmospheric inversions?
Source: Copernicus journal article supplement (doi:10.5194/acp-22-15489-2022), 2022-12-08
Supplement: Supplementary file 1 [file acp-22-15489-2022-supplement.pdf]

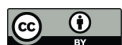

*Supplement of*

## **How do Cl concentrations matter for the simulation of CH<sub>4</sub> and $\delta^{13}\text{C}(\text{CH}_4)$ and estimation of the CH<sub>4</sub> budget through atmospheric inversions?**

**Joël Thanwerdas et al.**

*Correspondence to:* Joël Thanwerdas ([joel.thanwerdas@lsce.ipsl.fr](mailto:joel.thanwerdas@lsce.ipsl.fr))

The copyright of individual parts of the supplement might differ from the article licence.

The Supplementary Material provides additional information regarding the three methods adopted to estimate the CH<sub>4</sub> fluxes and isotopic source signature adjustments obtained with top-down approaches (Sect. S1, Sect. S2 and Sect. S3). Additional information regarding the multiple sensitivity simulations (Sect. S1, Figure S1, Figure S2, Figure S3, Table S1 and Table S2) are also provided. Also, a demonstration of the formula given in Sect. 3.2 in the main manuscript is provided (Sect. S4).  
5 Tables S5 and S6 provide a list of CH<sub>4</sub> and  $\delta^{13}\text{C}(\text{CH}_4)$  surface stations used in this study. Table S3 and Figure S4 provide the locations and a list of CH<sub>4</sub> AirCore profiles. Table S4 and Figure S5 provide the locations and a list of  $\delta^{13}\text{C}(\text{CH}_4)$  balloons profiles. Figure S6 provides maps of seasonal cycle amplitudes for multiple configurations. Figure S7 provides the time-series of the biases in atmospheric CH<sub>4</sub> mass.

## S 1 Method 1 – 3-D variational inversion

10 This section describes the Method 1 (M1) used in the main manuscript. It is based on the 3-D variational inversion system designed by Thanwerdas et al. (2022). Configurations adopted for running inversions with this system is presented below.

### S 1.1 The chemistry-transport model

The chemistry-transport model (CTM) LMDz-SACS is presented in the main manuscript. Oxidations by OH, O(<sup>1</sup>D) and Cl were included in the chemical scheme of LMDz-SACS. Time-varying 3-D fields with daily resolution were prescribed offline  
15 for each oxidant species to simulate the associated chemical loss. These fields were simulated by the LMDz-INCA chemistry model (Hauglustaine et al., 2004) with the same meteorology as in the simulations of this study.

The resulting OH field, named OH-INCA, exhibits a global mass-weighted tropospheric concentration of  $11.1 \times 10^5 \text{ molec. cm}^{-3}$  over the 1998-2018 period, consistent with the previous estimates from Zhao et al. (2019) ( $11.7 \times 10^5 \text{ molec. cm}^{-3}$ ), estimates from Prather et al. (2012) ( $11.2 \pm 1.3 \times 10^5 \text{ molec. cm}^{-3}$ ), and well within the range derived from the Atmospheric Chem-  
20 istry and climate Model Intercomparison Project (ACCMIP) ( $10.3\text{-}13.4 \times 10^5 \text{ molec. cm}^{-3}$ ; Voulgarakis et al., 2013). The inter-hemispheric ratio is 1.14, lower than the mean value of 1.3 inferred by Zhao et al. (2019) but more consistent with an inter-hemispheric parity suggested by Patra et al. (2014). OH-INCA globally-averaged concentrations increase by 4 % between 2002 and 2014.

### S 1.2 Inverse modelling with a variational approach

25 Inversions are powerful methods that optimize our prior knowledge of a state (here emissions) by assimilating data (here atmospheric CH<sub>4</sub> mole fractions and isotopic composition). Inversions were performed using the Community Inversion Framework (CIF) (Berchet et al., 2021). This framework was designed to rationalize and bridge development efforts made by the scientific community within the same flexible, transparent and open-source system. This system was recently enhanced by Thanwerdas

et al. (2022) to assimilate  $\delta^{13}\text{C}(\text{CH}_4)$  together with  $\text{CH}_4$  observations and optimize source signatures  $\delta^{13}\text{C}(\text{CH}_4)_{\text{source}}$  together  
 30 with  $\text{CH}_4$  emissions.

The notations introduced here to describe the variational inversion method follow the convention defined by Ide et al. (1997) and Rayner et al. (2019).  $\mathbf{x}$  is the control vector and includes all the variables optimized by the inversion system. Prior information about the control variables is included in the vector  $\mathbf{x}^b$ . Its associated errors are assumed to be unbiased and Gaussian, and are described within the error covariance matrix  $\mathbf{B}$ .

35 The observation vector  $\mathbf{y}^o$  includes here all available observations, namely atmospheric  $\text{CH}_4$  and  $\delta^{13}\text{C}(\text{CH}_4)$  data, over the full simulation time-window. The associated errors are also assumed to be unbiased and Gaussian, and are described within the error covariance matrix  $\mathbf{R}$ . This matrix accounts for all errors contributing to mismatches between simulated and observed values.

$\mathcal{H}$  is the observation operator that projects the control vector  $\mathbf{x}$  into the observation space. This operator mainly consists  
 40 of the CTM but is also followed by spatial, time and isotope-conversion operators, which interpolate the simulated fields to produce simulated equivalents of the observed mole fractions and isotopic composition at specific locations and times, making the simulations and observations comparable.

In a variational formulation of the inversion problem that allows for  $\mathcal{H}$  non-linearity, the cost function  $J$  is defined as :

$$J(\mathbf{x}) = \frac{1}{2}(\mathbf{x} - \mathbf{x}^b)^T \mathbf{B}^{-1}(\mathbf{x} - \mathbf{x}^b) + \frac{1}{2}(\mathcal{H}(\mathbf{x}) - \mathbf{y}^o)^T \mathbf{R}^{-1}(\mathcal{H}(\mathbf{x}) - \mathbf{y}^o) \quad (\text{S.1})$$

45 Here, the minimum of  $J$  is reached iteratively with the descent algorithm MIQN3 (Gilbert and Lemaréchal, 1989) that requires several computations (40-50) of the gradient of  $J$  with respect to the control vector  $\mathbf{x}$ :

$$\nabla J_{\mathbf{x}} = \mathbf{B}^{-1}(\mathbf{x} - \mathbf{x}^b) + \mathcal{H}^*(\mathbf{R}^{-1}(\mathcal{H}(\mathbf{x}) - \mathbf{y}^o)) \quad (\text{S.2})$$

$\mathcal{H}^*$  denotes the adjoint operator of  $\mathcal{H}$ .

All inversions performed as part of this study shared the same configuration. The only difference is the prescribed Cl sink. All  
 50 inversions assimilated  $\text{CH}_4$  and  $\delta^{13}\text{C}(\text{CH}_4)$  observations over the 1998-2018 period.  $\text{CH}_4$  emissions and  $\delta^{13}\text{C}(\text{CH}_4)$  source signatures for five categories of emissions were optimized : biofuels-biomass burning (BB), wetlands (WET), fossil fuels and geological sources (FFG), agriculture and waste (AGW) and other natural sources (NAT).  $\text{CH}_4$  and  $\delta^{13}\text{C}(\text{CH}_4)$  initial conditions were also optimized (see Sect. S 1.6 of the present document).

### S 1.3 Prior emissions and signatures

55 For prior  $\text{CH}_4$  emissions, we adopted the bottom-up estimates compiled for the inversions performed as part of the Global Methane Budget (Saunio et al., 2020). Anthropogenic (including biofuels) and fire emissions are based on the EDGARv4.3.2 database (Janssens-Maenhout et al., 2019) and the GFED4s databases (van der Werf et al., 2017), respectively. Statistics from British Petroleum (BP) and the Food and Agriculture Organization of the United Nations (FAO) have been used to extend the EDGARv4.3.2 database, ending 2012, until 2017. The natural sources emissions are based on averaged literature  
 60 values : Poulter et al. (2017) for wetlands, Kirschke et al. (2013) for termites, Lambert and Schmidt (1993), Etiope (2015) for

geological (onshore) sources and oceanic sources that include geological (offshore) and hydrates sources. Prior emissions for 2018 are set equal to 2017. Globally averaged emissions over the 1998-2018 period are listed in Table S1.

BB emissions are the combination of biomass burning emissions from GFED4s and biofuels burning emissions from EDGARv4.3.2. FFG emissions are the combination of oil, gas, coal and industry emissions from EDGARv4.3.2 and geological (onshore) sources from Etiope (2015) which have been scaled down to  $15.0 \text{ TgCH}_4 \text{ yr}^{-1}$  in the protocol of Saunio et al. (2020). AGW emissions are the combination of enteric fermentation, rice agriculture, manure management and waste emissions from EDGARv4.3.2. NAT emissions are the combination of termites and oceanic emissions, i.e., natural emissions apart from wetlands and geological sources.

Emissions are optimized at the grid cell scale (one scaling factor per grid cell). For each category, diagonal elements of the matrix **B** are filled with the variances set to 100 % of the square of the maximum of prior emissions over the cell and its eight neighbours during each month. Spatial error correlations (off-diagonal elements) are prescribed using an e-folding correlation length of 500 km on land and 1000 km over the oceans, without any correlation between land and ocean grid points. No temporal error correlations are prescribed.

$\delta^{13}\text{C}(\text{CH}_4)_{\text{source}}$  isotopic source signatures for each emissions category are also optimized and therefore included in the control vector. Prior information is built using the references given in Table S2. When regional information could be found, regional source signature values were prescribed onto 11 continental regions (see Fig. S2, lower-right panel). We optimized source signatures at the regional scale rather than at the grid cell scale (i.e., using only one scaling factor per region), as optimizing at the grid cell scale could result in substantial posterior differences between two adjacent grid cells. At present, there is not enough data to corroborate, explain or reject such differences.

Livestock source signatures have been likely decreasing over time since the 1990s due to changes in C3/C4 diet within the major livestock producing countries (Chang et al., 2019). Also, FFG regional source signatures can vary over time due to variations in the contributions from different sectors (coal, oil and gas) to the emissions of a specific region (Schwietzke et al., 2016; Feinberg et al., 2018). For AGW and FFG source signatures, we therefore optimize one scaling factor per year, for each region. As for the other emission categories, only one scaling factor for the entire period and for each region is optimized. Error correlations are prescribed by following the same methods as that for  $\text{CH}_4$  emissions.

#### S 1.4 Uncertainties in source signatures

$\delta^{13}\text{C}(\text{CH}_4)_{\text{source}}$  uncertainty values that are used to fill the diagonal elements of the matrix **B** are summarized in Table S1. These values have been chosen by compiling data from several studies (Sherwood et al., 2017; Ganesan et al., 2018; Feinberg et al., 2018; Zazzeri et al., 2016). As the inversion system is used over a long time period for the first time, a global uncertainty value has been prescribed for all emission categories. For BB sources, Sherwood et al. (2017) indicates a standard deviation of about 20 %. However, this value is not weighted by proportion C3 versus C4 vegetation. Therefore, we decided to inflate this uncertainty up to 30 %.

## S 1.5 Observations

Measurements retrieved by the NOAA-ESRL Global Monitoring Laboratory (NOAA GML) network and analyzed by the  
95 Institute of Arctic and Alpine Research (INSTAAR) are assimilated. 79 stations (among which 4 mobile stations) provided CH<sub>4</sub>  
measurements between 1998 and 2018 (not necessarily over the full period), 22 stations provided  $\delta^{13}\text{C}(\text{CH}_4)$  measurements  
between 1998 and 2018 (see Fig. S3).

Missing CH<sub>4</sub> measurement errors were filled with the maximum value at the station over the monitoring period. As for  
 $\delta^{13}\text{C}(\text{CH}_4)$  measurements, missing errors were filled with a value of 0.1 ‰ and 3 ‰, respectively (Quay et al., 1999). We also  
100 removed outliers outside three times the residual standard deviations as such extreme values cannot be reasonably captured at  
the resolution of LMDz. Variances (diagonal elements) in the covariance matrix **R** were defined as the sum of the measurement  
and model errors.

For each station and each year, we used the Residual Standard Deviation (RSD) between the measurements and a fitting curve  
function as a proxy for the model error (Locatelli et al., 2015, 2013; Cressot et al., 2014; Yver et al., 2011; Bousquet et al.,  
105 2006; Rodenbeck et al., 2003). The fitting function includes 3 polynomial parameters (quadratic) and 8 harmonic parameters,  
sinus and cosinus, as in Masarie and Tans (1995).

More information about the surface stations is provided in Tables S5 and S6 as well as in Figure S3.

## S 1.6 Initial conditions

To infer initial conditions in 1998 for CH<sub>4</sub> and  $\delta^{13}\text{C}(\text{CH}_4)$ , we run a shorter inversion between 1988 and 1998 using the  
110 configuration described in the previous sections. The state of the atmosphere in January 1998 was used as initial conditions for  
the 1998-2018 inversions.

We assimilated CH<sub>4</sub> measurements from the NOAA GML network (56 stations) and  $\delta^{13}\text{C}(\text{CH}_4)$  measurements retrieved at  
5 stations across the globe by the University of Washington (UW) between 1988 and 1996 (Quay et al., 1999; Bousquet et al.,  
2006) that we offset by 0.1 ‰ to account for measurement offsets between INSTAAR and UW (Umezawa et al., 2018).

115 As we acknowledge that this method is not perfect considering the equilibration time of the isotopic composition (Tans,  
1997), we also prescribe large uncertainties in these initial conditions : 10 % for CH<sub>4</sub> and 3 % for  $\delta^{13}\text{C}(\text{CH}_4)$ .

## S 2 Method 2 – 1-D analytical inversion

This section describes the Method 2 (M2) used in the main manuscript. For the purpose of this study, we built an analytical  
120 inversion framework based on a very simple one-box model representing the atmosphere. We use the same notations introduced  
in Sect. S 1.2.

### S 2.1 The control vector

The control vector  $\mathbf{x}$  includes monthly global CH<sub>4</sub> fluxes and monthly global isotopic source signature  $\delta^{13}\text{C}(\text{CH}_4)_{\text{source}}$  for the  
1998-2018 period, i.e.  $252 \times 2 = 504$  values. We also include two increments for CH<sub>4</sub> and  $\delta^{13}\text{C}(\text{CH}_4)$  initial conditions. The  
125 prior global fluxes and source signatures are the same as in Sect. S1.

To fill the diagonal of the matrix  $\mathbf{B}$ , we prescribe a flux uncertainty of 50 TgCH<sub>4</sub> yr<sup>-1</sup> (one standard deviation) and a source  
isotopic signature uncertainty of 5 ‰. As for initial conditions, we prescribe an uncertainty of 5 ppb for CH<sub>4</sub> and 0.1 ‰ for  
 $\delta^{13}\text{C}(\text{CH}_4)$ .

### S 2.2 The observation vector

130 The  $\delta^{13}\text{C}(\text{CH}_4)$  data presented in Sect. S1 is also used for the inversions performed with this inversion framework. However,  
the observations are globally averaged using a similar method to Masarie and Tans (1995) to preserve only a global monthly  
time-series that can be assimilated in our inversion. As for CH<sub>4</sub>, we use the monthly data available at [https://gml.noaa.gov/ccgg/trends\\_ch4/](https://gml.noaa.gov/ccgg/trends_ch4/). We prescribe an observational uncertainty of 2 ppb for CH<sub>4</sub> and 0.1 ‰ for  $\delta^{13}\text{C}(\text{CH}_4)$ .

### S 2.3 The observation operator

135 The observation operator  $\mathcal{H}$  (one-box model) consists in two mass-conservation equations for <sup>12</sup>CH<sub>4</sub> et <sup>13</sup>CH<sub>4</sub> :

$$\begin{cases} \frac{dB_{12}}{dt} = S_{12} - \frac{B_{12}}{\tau_{12}} \\ \frac{dB_{13}}{dt} = S_{13} - \frac{B_{13}}{\tau_{13}} \end{cases} \quad (\text{S.3})$$

$B_{12}$  et  $B_{13}$  are the total masses of <sup>12</sup>CH<sub>4</sub> and <sup>13</sup>CH<sub>4</sub> in the atmosphere, respectively.  $\tau_{12}$  and  $\tau_{13}$  are the chemical lifetimes of  
<sup>12</sup>CH<sub>4</sub> and <sup>13</sup>CH<sub>4</sub> in the atmosphere, respectively. Their numerical values are based on the outputs of the forward simulations  
performed for each scenario (FWD-\*) and are calculated by dividing the tracer total mass in the atmosphere by the total sink.

140  $S_{12}$  and  $S_{13}$  are the global mass fluxes of <sup>12</sup>CH<sub>4</sub> and <sup>13</sup>CH<sub>4</sub>, respectively. They are calculated using the total CH<sub>4</sub> fluxes and  
source signatures included in the control vector :

$$\begin{cases} F_{12} = \frac{M_{12}}{M_T} \cdot \frac{1}{1+A} \cdot F_T \\ F_{13} = \frac{M_{13}}{M_T} \cdot \frac{A}{1+A} \cdot F_T \end{cases} \quad (\text{S.4})$$

with

$$A = (1 + \delta^{13}\text{C}(\text{CH}_4)_{\text{source}}) \cdot R_{\text{std}} \quad (\text{S.5})$$

145  $F_T$ ,  $F_{12}$  and  $F_{13}$  are the  $\text{CH}_4$ ,  $^{12}\text{CH}_4$  and  $^{13}\text{CH}_4$  mass fluxes, respectively.  $M_T$ ,  $M_{12}$  and  $M_{13}$  are the  $\text{CH}_4$ ,  $^{12}\text{CH}_4$  and  $^{13}\text{CH}_4$  molar masses, respectively. After the simulation, we retrieve the total mass of  $\text{CH}_4$ , denoted by  $B$ , and the atmospheric isotopic composition  $\delta^{13}\text{C}(\text{CH}_4)$ :

$$\left\{ \begin{array}{l} B = \left( \frac{B_{12}}{M_{12}} + \frac{B_{13}}{M_{13}} \right) \cdot M_T \\ \delta^{13}\text{C}(\text{CH}_4) = \frac{\frac{B_{13}}{B_{12}} \cdot \frac{M_{12}}{M_{13}}}{R_{\text{std}}} - 1 \end{array} \right. \quad (\text{S.6})$$

To compare the total atmospheric  $\text{CH}_4$  mass and the observed  $\text{CH}_4$  mole fraction at the surface, we use a conversion factor  
 150 in  $\text{TgCH}_4^{-1}$  ppb that is calculated using the outputs of the forward simulations (FWD-\*) by dividing the tracer total mass by the tropospheric mass-weighted average of mole fractions. Also, throughout the study, quantities in  $\text{molec. cm}^{-3}$  are averaged using a volume-weighted averaging and quantities in volume mixing ratio are averaged using a mass-weighted average.

## S 2.4 The analytical solution

If the observation operator is assumed to be linear, the solution of this inversion problem is :

$$155 \quad \mathbf{x}^a = \mathbf{x}^b + \mathbf{B}\mathbf{H}^T(\mathbf{R} + \mathbf{H}\mathbf{B}\mathbf{H}^T)^{-1}(\mathbf{y}^o - \mathbf{H}\mathbf{x}^b) \quad (\text{S.7})$$

Here, we cannot consider that the observation operator is linear due to the isotopic operations and the chemistry reactions (accounting for in the lifetime). If the problem is assumed to be only slightly non-linear, an iterative inversion procedure can be used in which the system is linearized around the current control vector  $\mathbf{x}_i^a$  at each iteration  $i$ . Under these conditions, the expression of the optimal control vector becomes, for iteration  $i + 1$  using a formulation at fixed point  $\mathbf{x}^b$  (Tarantola, 1987) :

$$160 \quad \mathbf{x}_{i+1}^a = \mathbf{x}^b + \mathbf{B}\mathbf{H}_{\mathbf{x}_i^a}^T(\mathbf{R} + \mathbf{H}_{\mathbf{x}_i^a}\mathbf{B}\mathbf{H}_{\mathbf{x}_i^a}^T)^{-1}(\mathbf{y}^o - \mathcal{H}(\mathbf{x}_i^a) + \mathbf{H}_{\mathbf{x}_i^a}(\mathbf{x}_i^a - \mathbf{x}^b)) \quad (\text{S.8})$$

This formulation requires to derive the tangent-linear operations of the forward model and to calculate the tangent-linear operator around the current control vector  $\mathbf{x}_i^a$  at each iteration. The convergence is reached after only three iterations.

### S 3 Method 3 – Simple estimation based on forward simulations

The method 3 does not require to run inversions. It is based on the outputs of forward simulations (FWD-\*) performed with  
 165 different prescribed Cl field. We demonstrate here that we can easily infer the adjustment value/increment that an inversion  
 system would apply to the prior global flux and the globally-averaged isotopic source signature in order to fit the observational  
 data.

In a one-box model, the temporal evolution of the CH<sub>4</sub> total mass is described by the equation below :

$$\frac{dB}{dt} = S - \frac{B}{\tau} \quad (\text{S.9})$$

170 where  $B$  is the mass of CH<sub>4</sub> in the atmosphere in TgCH<sub>4</sub>,  $S$  is the source in TgCH<sub>4</sub> yr<sup>-1</sup> and  $\tau$  is the chemical lifetime of  
 CH<sub>4</sub> in the atmosphere in yr. If the total mass of CH<sub>4</sub> is increasing in response to a flux enhancement, the total sink will also  
 increase and lead to a stabilization of the total mass after several decades.

In this study, the bias between the CH<sub>4</sub> atmospheric masses is caused by a change in  $\tau$  because we modify the Cl field. The  
 evolution of the bias  $b$  can therefore be described by the equation :

$$175 \frac{db}{dt} = \frac{d(B_2 - B_1)}{dt} = -\frac{B_1}{\tau_1} + \frac{B_2}{\tau_2} \quad (\text{S.10})$$

Fig S7 shows that, after 21 years of simulation, this bias appears to be tending towards a stabilized value.

In a surface-based inversion (i.e., an inversion assimilating observations from surface stations) without sink optimization,  
 the bias is compensated for by a correction of the CH<sub>4</sub> global surface flux  $S + \Delta S$ . The inversion system therefore provides an  
 answer to the question : "What is the value of  $\Delta S$  that will offset the bias caused by a change in the prescribed sink ?". The  
 180 temporal evolution of the bias between a simulation and the reference simulation can therefore be described by the equation :

$$\frac{db}{dt} = \Delta S - \frac{b}{\tau_{ref}} \quad (\text{S.11})$$

$\tau_{ref}$  denotes the chemical lifetime in the reference simulation, namely the lifetime in INV-Wang / FWD-Wang. We assume that  
 $\Delta S$  is constant over time because the contribution from the Cl sink to the atmospheric lifetime of CH<sub>4</sub> is very small and also  
 because the inter-annual variability of the Cl sink is below 4 % of the mean value for all Cl fields. M1 and M2 results confirm  
 185 that the inter-annual variations of adjustments (see error bars in Fig. 3 in the main manuscript) are below 10 % of the mean  
 value. Furthermore, we assume  $\tau_{ref}$  to be constant over time because the variation around the mean value is below 2 %.

Under these assumptions, the solution of this equation is :

$$b(t) = \Delta S \times \tau_{ref} \times \left(1 - e^{-\frac{t}{\tau_{ref}}}\right) \quad (\text{S.12})$$

The value of  $\Delta S$  can be obtained by analyzing the temporal evolution of the bias and, in particular, by looking at the value of  
 190 the bias when it is stabilized. Here, after 21 years of simulation, the stabilization is not reached yet. Therefore, we extend our  
 results by applying a curve fitting function to our simulated values :

$$b_X(t) = A_X \times \tau_{ref} \times \left(1 - e^{-\frac{t}{\tau_{ref}}}\right) \quad (\text{S.13})$$



$A_X$  is a constant that the curve fitting algorithm returns in order to maximize the agreement between the simulated values and the curve fitting function. Using this function, the results are extended until 2070 to reach a clear stabilization of the simulated biases.

An estimate of  $\Delta S$  is provided by the coefficient  $A_X$ . This theoretical framework is valid for both  $^{12}\text{CH}_4$  and  $^{13}\text{CH}_4$  isotopologues. Therefore, we use it for both tracers and to derive numerical values for both  $\Delta S_{12}$  and  $\Delta S_{13}$ . With these values, it is easy to find  $\Delta S$  and  $\Delta\delta^{13}\text{C}(\text{CH}_4)_{\text{source}}$ .

#### S 4 Calculating the stabilization value of the globally-averaged isotopic source signature

Here, we demonstrate the result used in Sect. 3.2 of the main paper. That is, the  $\delta^{13}\text{C}(\text{CH}_4)$  bias, denoted by  $\Delta\delta_a$ , between two simulations prescribing the same  $\text{CH}_4$  source, the same source signature  $\delta_s$  but different isotopic fractionations  $\varepsilon$ , tends to a steady-state value (steady-state) that is given by the formula below:

$$\Delta\delta_a \approx -\Delta\varepsilon \cdot (1 + \delta_s) \quad (\text{S.14})$$

For ease of demonstration, this relationship is shown by approximating that the tropospheric mixing ratios of  $^{12}\text{CH}_4$  are equal to those of  $\text{CH}_4$  and we simplify the problem by reducing it to a one-box model problem.

If we start from a mass-conservation equation in a one-box problem, we have :

$$\begin{cases} \frac{dB}{dt} = S - k \cdot B \\ \frac{dB_{13}}{dt} = S_{13} - k_{13} \cdot B_{13} \end{cases} \quad (\text{S.15})$$

where  $B$  et  $B_{13}$  are the total masses of  $^{12}\text{CH}_4$  et  $^{13}\text{CH}_4$  in the atmosphere, respectively.  $k$  and  $k_{13}$  are the reaction rate constants of  $^{12}\text{CH}_4$  and  $^{13}\text{CH}_4$  chemical sinks, respectively.  $S$  and  $S_{13}$  are the total sources of  $^{12}\text{CH}_4$  and  $^{13}\text{CH}_4$  (including soil sink as a negative source), respectively.

Let  $R_{\text{atm}}$ ,  $R_s$  and  $\varepsilon = \alpha - 1 = \frac{k_{13}}{k} - 1$  be the atmospheric isotopic ratio, the source isotopic ratio and the isotopic fractionation coefficient of the total chemical  $\text{CH}_4$  sink. We can infer an equation linking these three terms :

$$\frac{dB_{13}}{dt} = S_{13} - k_{13} \cdot B_{13} \quad (\text{S.16})$$

$$\implies \frac{d(R_{\text{atm}} \cdot B)}{dt} = R_s \cdot S - (k \cdot \alpha) \cdot (R_{\text{atm}} \cdot B) \quad (\text{S.17})$$

$$\implies \frac{d(R_{\text{atm}} \cdot B)}{dt} = R_s \cdot S - (1 + \varepsilon) \cdot R_{\text{atm}} \cdot P \quad (\text{S.18})$$

Here,  $P = k \cdot B$  is the total sink. At steady state, with time derivatives equal to zero, we have :

$$\begin{cases} S - P = 0 \\ R_s \cdot S - (1 + \varepsilon) \cdot R_{\text{atm}} \cdot P = 0 \end{cases} \quad (\text{S.19})$$

Subsequently, these equations can be reshaped to obtain a relationship between  $\delta_a$ , which is the mean atmospheric isotopic composition at steady state, and  $\delta_s$ , which is the globally-averaged isotopic source signature.

$$220 \quad R_s \cdot S - (1 + \varepsilon) \cdot R_{\text{atm}} \cdot P = 0 \quad (\text{S.20})$$

$$\implies R_s - (1 + \varepsilon) \cdot R_{\text{atm}} = 0 \quad (\text{S.21})$$

$$\implies (1 + \delta_s) \cdot R_{\text{std}} = (1 + \varepsilon) \cdot (1 + \delta_a) \cdot R_{\text{std}} \quad (\text{S.22})$$

$$\implies \delta_a = \frac{1 + \delta_s}{1 + \varepsilon} - 1 \quad (\text{S.23})$$

With  $\delta^{13}\text{C}(\text{CH}_4)$ , we have  $1 + \varepsilon \approx 1$  :

$$225 \quad \delta_a \approx \delta_s - \varepsilon - \delta_s \cdot \varepsilon \quad (\text{S.24})$$

Therefore, the bias  $\Delta\delta_a$  between two simulations prescribing the same  $\text{CH}_4$  source, the same source signature  $\delta_s$  but different isotopic fractionations  $\varepsilon$  is given by the formula :

$$\Delta\delta_a \approx -\Delta\varepsilon \cdot (1 + \delta_s) \quad (\text{S.25})$$

**Table S1.** Prior emissions and flux-weighted isotopic signatures averaged over 1998-2018 for different categories and sub-categories. Values between brackets indicate the minimum and maximum over the time period. \* Unc. : Prior uncertainty as a percentage of the grid cell value (or regional value for the signatures) used to fill the matrix **B**.

| Categories | Emissions<br>TgCH <sub>4</sub> yr <sup>-1</sup> | Unc.* | $\delta^{13}\text{C}(\text{CH}_4)_{\text{source}}$<br>‰ vs PDB | Unc.* |
|------------|-------------------------------------------------|-------|----------------------------------------------------------------|-------|
| WET        | 180 [180 / 180]                                 | 100 % | -60.8 [-60.8 / -60.8]                                          | 10 %  |
| AGW        | 213 [195 / 232]                                 | 100 % | -59.1 [-59.2 / -59.0]                                          | 10 %  |
| FFG        | 117 [99 / 133]                                  | 100 % | -44.9 [-45.6 / -44.4]                                          | 20 %  |
| BB         | 27 [24 / 35]                                    | 100 % | -22.3 [-22.5 / -22.2]                                          | 30 %  |
| NAT        | 23 [23 / 23]                                    | 100 % | -50.7 [-50.7 / -50.7]                                          | 15 %  |

**Table S2.** Global flux-weighted values and references for  $\delta^{13}\text{C}(\text{CH}_4)_{\text{source}}$  source signatures associated to the different emission categories and subcategories. \* Values are prescribed at regional or grid cell scale (see Fig. S2).

E19 : (Etiopie et al., 2019) ; CH19 : Chang et al. (2019) ; GA18 : Ganesan et al. (2018) ; TH18 : Thompson et al. (2018) ; SH17 : Sherwood et al. (2017) ; SH16 : Schwietzke et al. (2016) ; WA16 : Warwick et al. (2016) ; ZA16 : Zazzeri et al. (2016) ; TO12 : Townsend-Small et al. (2012) ; KL10 : Klevenhusen et al. (2010) ; BO06 : Bousquet et al. (2006) ; BR01 : Bréas et al. (2001) ; SA01 : Sansone et al. (2001) ; CH00 : Chanton et al. (2000) ; HO00 : Holmes et al. (2000) ; CH99 : Chanton et al. (1999) ; BE98 : Bergamaschi et al. (1998) ; LE93 : Levin et al. (1993);

| Categories | Global signatures (%) | Subcategories        | Global signature (%) | References                |
|------------|-----------------------|----------------------|----------------------|---------------------------|
| AGW        | -59.1 *               | Rice cultivation     | -63.0                | SH17; BO06; BR01          |
|            |                       | Enteric fermentation | -64.7 *              | CH19                      |
|            |                       | Agriculture waste    | -52.0                | KL10 ; LE93               |
|            |                       | Landfills            | -52.0                | TO12 ; CH99 ; BE98 ; LE93 |
|            |                       | Waste water          | -48.0                | TO12 ; CH99 ; BE98 ; LE93 |
| FFG        | -44.9 *               | Oil and gas          | -44.9 *              | SH07                      |
|            |                       | Coal                 | -42.3 *              | SH07 ; ZA16               |
|            |                       | Geological sources   | -49                  | E19                       |
| BB         | -22.3 *               | Biomass burning      | -24.9 *              | BO06 ; CH00               |
|            |                       | Biofuel burning      | -20                  | CH00                      |
| WET        | -60.8 *               | Wetlands             | -60.8 *              | GA18                      |
| NAT        | -50.7 *               | Oceanic sources      | -42                  | BR01; HO00 ; SA01         |
|            |                       | Termites             | -63                  | TH18; SH16 ; SH17; WA16   |

**Table S3.** Providers, locations and number of vertical profiles of CH<sub>4</sub> retrieved using AirCore technique between 2012 and 2018. The longitude and latitude given here are means over the AirCore descent profile.

| <b>Provider</b>            | <b>Location</b>           | <b>Number of profiles</b> | <b>Longitude</b> | <b>Latitude</b> |
|----------------------------|---------------------------|---------------------------|------------------|-----------------|
| NOAA-ESRL Aircraft Program | Edwards AFB/Dryden, USA   | 6                         | 117.51° W        | 34.58° N        |
|                            | Boulder, CO, USA          | 33                        | 104.34° W        | 39.53° N        |
|                            | Lamont, OK, USA           | 30                        | 97.45° W         | 36.65° N        |
|                            | Park Falls, WI, USA       | 4                         | 90.27° W         | 46.03° N        |
|                            | Sodankylä, Finland        | 6                         | 25.97° E         | 67.60° N        |
|                            | Lauder, NZ                | 1                         | 170.01° E        | 45.19° S        |
| French AirCore Program     | Alice Springs, Australia  | 3                         | 132.58° E        | 23.66° S        |
|                            | Aire-sur-l'Adour, France  | 9                         | 1.02° E          | 43.25° N        |
|                            | Trainou, France           | 17                        | 1.86° E          | 47.30° N        |
|                            | Timmins, Ontario, Canada  | 4                         | 83.28° W         | 48.49° N        |
|                            | Estrange, Northern Sweden | 2                         | 22.86° E         | 67.87° N        |

**Table S4.** Balloon flights and number of samples analyzed for  $\delta^{13}\text{C}(\text{CH}_4)$  vertical profiles. Each flight is given a flight ID as STA-JJ-MM, where STA is the 3-letter-code for the balloon launch station, JJ the year and MM the month of sampling. This Table is adapted from Röckmann et al. (2011). <sup>1</sup> HYD: Hyderabad, India (17.5 °N, 78.60 °E); <sup>2</sup> KIR: Kiruna, Sweden (67.9 °N, 21.10 °E); <sup>3</sup> ASA: Aire sur l'Adour, France (43.70 °N, - 0.30 °E); <sup>4</sup> GAP: Gap, France (44.44 °N, 6.14 °E);

| Flight ID                                                                          | Flight Date | Location         | Number of $\delta^{13}\text{C}(\text{CH}_4)$ samples | Characteristics                      |
|------------------------------------------------------------------------------------|-------------|------------------|------------------------------------------------------|--------------------------------------|
| Flights operated by MPI für Sonnensystemforschung                                  |             |                  |                                                      |                                      |
| HYD-99-04                                                                          | 04/29/99    | HYD <sup>1</sup> | 10                                                   | Subtropical                          |
| GAP-99-06                                                                          | 06/23/99    | GAP <sup>4</sup> | 15                                                   | Mid-latitude summer                  |
| Flights operated by Institut für Meteorologie und Geophysik, Universität Frankfurt |             |                  |                                                      |                                      |
| KIR-00-01                                                                          | 01/03/00    | KIR <sup>2</sup> | 13                                                   | Arctic strong vortex                 |
| ASA-01-10                                                                          | 10/11/01    | ASA <sup>3</sup> | 13                                                   | Mid-latitude background              |
| ASA-02-09                                                                          | 09/15/02    | ASA <sup>3</sup> | 13                                                   | Mid-latitude background              |
| KIR-03-03                                                                          | 03/06/03    | KIR <sup>2</sup> | 13                                                   | Arctic vortex, mesospheric enclosure |
| KIR-03-03                                                                          | 06/09/03    | KIR <sup>2</sup> | 13                                                   | Arctic summer                        |

**Table S5.** List of CH<sub>4</sub> surface in-situ observation sites that provided measurements assimilated in the inversion between 1998 and 2018. AOC, PAO, POC et WPC are mobile stations. Their characteristics are compiled into a single line, providing latitude and longitude ranges of the measurements. Stations that retrieved samples consisting mainly of well-mixed Marine Boundary Layer (MBL) air are indicated in bold red.

| Site code  | Station name                                        | Country/Territory    | Network | Latitude             | Longitude             | Elevation (m a.s.l.) | Date range (MM/YYYY) |
|------------|-----------------------------------------------------|----------------------|---------|----------------------|-----------------------|----------------------|----------------------|
| <b>ABP</b> | Arembepe                                            | Brazil               | NOAA    | 12.76° S             | 38.16° W              | 6                    | 10/2006 - 01/2010    |
| <b>ALT</b> | Alert                                               | Canada               | NOAA    | 82.45° N             | 62.51° W              | 195                  | 01/1998 - 12/2018    |
| AMT        | Argyle                                              | United States        | NOAA    | 45.03° N             | 68.68° W              | 157                  | 09/2003 - 12/2008    |
| AMY        | Anmyeon-do                                          | Republic of Korea    | NOAA    | 36.54° N             | 126.33° E             | 125                  | 12/2013 - 12/2018    |
| AOC        | Atlantic Ocean Cruise                               | N/A                  | NOAA    | 30.30° S<br>35.00° N | -75.11° W<br>13.57° E | 22                   | 05/2004 - 02/2005    |
| <b>ASC</b> | Ascension Island                                    | United Kingdom       | NOAA    | 7.97° S              | 14.40° W              | 90                   | 01/1998 - 12/2018    |
| ASK        | Assekrem                                            | Algeria              | NOAA    | 23.26° N             | 5.63° E               | 2715                 | 01/1998 - 12/2018    |
| <b>AZR</b> | Terceira Island                                     | Portugal             | NOAA    | 38.77° N             | 27.38° W              | 24                   | 01/1998 - 12/2018    |
| BAL        | Baltic Sea                                          | Poland               | NOAA    | 55.43° N             | 16.95° E              | 28                   | 01/1998 - 06/2011    |
| BHD        | Baring Head Station                                 | New Zealand          | NOAA    | 41.41° S             | 174.87° E             | 90                   | 10/1999 - 12/2018    |
| BKT        | Bukit Kototabang                                    | Indonesia            | NOAA    | 0.20° S              | 100.32° E             | 875                  | 01/2004 - 12/2018    |
| <b>BME</b> | St. Davids Head                                     | United Kingdom       | NOAA    | 32.37° N             | 64.65° W              | 17                   | 01/1998 - 01/2010    |
| <b>BMW</b> | Tudor Hill                                          | United Kingdom       | NOAA    | 32.26° N             | 64.88° W              | 60                   | 01/1998 - 12/2018    |
| <b>BRW</b> | Barrow Atmospheric Baseline Observatory             | United States        | NOAA    | 71.32° N             | 156.60° W             | 13                   | 01/1998 - 12/2018    |
| BSC        | Black Sea                                           | Romania              | NOAA    | 44.18° N             | 28.66° E              | 5                    | 01/1998 - 12/2011    |
| <b>CBA</b> | Cold Bay                                            | United States        | NOAA    | 55.20° N             | 162.72° W             | 25                   | 01/1998 - 12/2018    |
| <b>CGO</b> | Cape Grim                                           | Australia            | NOAA    | 40.68° S             | 144.68° E             | 164                  | 01/1998 - 12/2018    |
| <b>CHR</b> | Christmas Island                                    | Republic of Kiribati | NOAA    | 1.70° N              | 157.15° W             | 5                    | 11/1998 - 12/2018    |
| CIB        | Centro de Investigacion de la Baja Atmosfera (CIBA) | Spain                | NOAA    | 41.81° N             | 4.93° W               | 850                  | 05/2009 - 12/2018    |
| CMO        | Cape Meares                                         | United States        | NOAA    | 45.48° N             | 123.97° W             | 35                   | 03/1998 - 03/1998    |
| CPT        | Cape Point                                          | South Africa         | NOAA    | 34.35° S             | 18.49° E              | 260                  | 02/2010 - 12/2018    |
| <b>CRZ</b> | Crozet Island                                       | France               | NOAA    | 46.43° S             | 51.85° E              | 202                  | 01/1998 - 11/2018    |
| DRP        | Drake Passage                                       | nan                  | NOAA    | 57.65° S             | 64.18° W              | 10                   | 04/2003 - 12/2018    |
| DSI        | Dongsha Island                                      | Taiwan               | NOAA    | 20.70° N             | 116.73° E             | 8                    | 03/2010 - 12/2018    |
| EIC        | Easter Island                                       | Chile                | NOAA    | 27.15° S             | 109.45° W             | 55                   | 01/1998 - 12/2018    |
| <b>GMI</b> | Mariana Islands                                     | Guam                 | NOAA    | 13.39° N             | 144.66° E             | 6                    | 01/1998 - 12/2018    |
| GOZ        | Dwejra Point                                        | Malta                | NOAA    | 36.05° N             | 14.89° E              | 6                    | 01/1998 - 02/1999    |
| <b>HBA</b> | Halley Station                                      | United Kingdom       | NOAA    | 75.61° S             | 26.21° W              | 35                   | 01/1998 - 02/2018    |
| HPB        | Hohenpeissenberg                                    | Germany              | NOAA    | 47.80° N             | 11.02° E              | 990                  | 04/2006 - 12/2018    |
| HSU        | Humboldt State University                           | United States        | NOAA    | 41.05° N             | 124.73° W             | 7                    | 05/2008 - 05/2017    |

**Table S5.** Following Table S5

| Site code  | Station name                  | Country/Territory         | Network | Latitude | Longitude | Elevation (m a.s.l.) | Date range (MM/YYYY) |
|------------|-------------------------------|---------------------------|---------|----------|-----------|----------------------|----------------------|
| HUN        | Hegyhatsal                    | Hungary                   | NOAA    | 46.95° N | 16.65° E  | 344                  | 01/1998 - 12/2018    |
| <b>ICE</b> | Storhofdi                     | Iceland                   | NOAA    | 63.40° N | 20.29° W  | 127                  | 01/1998 - 12/2018    |
| ITN        | Grifton                       | United States             | NOAA    | 35.37° N | 77.39° W  | 505                  | 01/1998 - 06/1999    |
| IZO        | Izana                         | Spain                     | NOAA    | 28.30° N | 16.48° W  | 2377                 | 01/1998 - 12/2018    |
| KCO        | Kaashidhoo                    | Republic of Maldives      | NOAA    | 4.97° N  | 73.47° E  | 6                    | 03/1998 - 07/1999    |
| <b>KEY</b> | Key Biscayne                  | United States             | NOAA    | 25.67° N | 80.20° W  | 6                    | 01/1998 - 12/2018    |
| <b>KUM</b> | Cape Kumukahi                 | United States             | NOAA    | 19.52° N | 154.82° W | 8                    | 01/1998 - 12/2018    |
| KZD        | Sary Taukum                   | Kazakhstan                | NOAA    | 44.45° N | 75.57° E  | 412                  | 01/1998 - 08/2009    |
| KZM        | Plateau Assy                  | Kazakhstan                | NOAA    | 43.25° N | 77.88° E  | 2524                 | 01/1998 - 08/2009    |
| LEF        | Park Falls                    | United States             | NOAA    | 45.93° N | 90.27° W  | 868                  | 01/1998 - 12/2018    |
| LLB        | Lac La Biche                  | Canada                    | NOAA    | 54.95° N | 112.45° W | 546                  | 01/2008 - 02/2013    |
| LLN        | Lulin                         | Taiwan                    | NOAA    | 23.46° N | 120.86° E | 2867                 | 08/2006 - 12/2018    |
| LMP        | Lampedusa                     | Italy                     | NOAA    | 35.51° N | 12.61° E  | 50                   | 10/2006 - 12/2018    |
|            | High Altitude Global          |                           |         |          |           |                      |                      |
| MEX        | Climate Observation Center    | Mexico                    | NOAA    | 18.98° N | 97.31° W  | 4469                 | 01/2009 - 12/2018    |
| <b>MHD</b> | Mace Head                     | Ireland                   | NOAA    | 53.33° N | 9.90° W   | 26                   | 01/1998 - 12/2018    |
| <b>MID</b> | Sand Island                   | United States             | NOAA    | 28.22° N | 177.37° W | 8                    | 01/1998 - 12/2018    |
| MKN        | Mt. Kenya                     | Kenya                     | NOAA    | 0.06° S  | 37.30° E  | 3649                 | 12/2003 - 06/2011    |
| MLO        | Mauna Loa                     | United States             | NOAA    | 19.53° N | 155.58° W | 3437                 | 01/1998 - 12/2018    |
| NAT        | Farol De Mae Luiza Lighthouse | Brazil                    | NOAA    | 5.51° S  | 35.26° W  | 20                   | 09/2010 - 12/2018    |
| NMB        | Gobabeb                       | Namibia                   | NOAA    | 23.58° S | 15.03° E  | 461                  | 07/1998 - 12/2018    |
| NWR        | Niwot Ridge                   | United States             | NOAA    | 40.05° N | 105.58° W | 3526                 | 01/1998 - 12/2018    |
| OXK        | Ochsenkopf                    | Germany                   | NOAA    | 50.03° N | 11.81° E  | 1185                 | 03/2003 - 12/2018    |
| PAL        | Pallas-Sammaltunturi          | Finland                   | NOAA    | 67.97° N | 24.12° E  | 570                  | 12/2001 - 12/2018    |
| PAO        | Pacific-Atlantic Ocean        | N/A                       | NOAA    | 30.20° S | 164.58° W | 10                   | 03/2006 - 10/2006    |
|            |                               |                           |         | 67.86° N | 9.93° W   |                      |                      |
| <b>POC</b> | Pacific Ocean                 | N/A                       | NOAA    | 36.67° S | 180.00° W | 20                   | 04/1998 - 07/2017    |
|            |                               |                           |         | 35.07° N | 179.83° E |                      |                      |
| <b>PSA</b> | Palmer Station                | United States             | NOAA    | 64.92° S | 64.00° W  | 15                   | 01/1998 - 12/2018    |
| PTA        | Point Arena                   | United States             | NOAA    | 38.95° N | 123.73° W | 22                   | 01/1999 - 05/2011    |
| <b>RPB</b> | Ragged Point                  | Barbados                  | NOAA    | 13.16° N | 59.43° W  | 20                   | 01/1998 - 12/2018    |
| SDZ        | Shangdianzi                   | Peoples Republic of China | NOAA    | 40.65° N | 117.12° E | 298                  | 09/2009 - 09/2015    |
| SEY        | Mahe Island                   | Seychelles                | NOAA    | 4.68° S  | 55.53° E  | 7                    | 01/1998 - 12/2018    |



**Table S5.** Following Table S5

| Site code  | Station name                                         | Country/Territory         | Network | Latitude             | Longitude              | Elevation (m a.s.l.) | Date range (MM/YYYY) |
|------------|------------------------------------------------------|---------------------------|---------|----------------------|------------------------|----------------------|----------------------|
| SGP        | Southern Great Plains                                | United States             | NOAA    | 36.62° N             | 97.48° W               | 374                  | 04/2002 - 12/2018    |
| <b>SHM</b> | Shemya Island                                        | United States             | NOAA    | 52.72° N             | 174.10° E              | 28                   | 01/1998 - 10/2018    |
| <b>SMO</b> | Tutuila                                              | American Samoa            | NOAA    | 14.25° S             | 170.57° W              | 47                   | 01/1998 - 12/2018    |
| <b>SPO</b> | South Pole                                           | United States             | NOAA    | 89.98° S             | 24.80° W               | 2821                 | 01/1998 - 12/2018    |
| <b>STM</b> | Ocean Station M                                      | Norway                    | NOAA    | 66.00° N             | 2.00° E                | 7                    | 01/1998 - 11/2009    |
| SUM        | Summit                                               | Greenland                 | NOAA    | 72.60° N             | 38.42° W               | 3214                 | 01/1998 - 12/2018    |
| <b>SYO</b> | Syowa Station                                        | Japan                     | NOAA    | 69.00° S             | 39.58° E               | 16                   | 01/1998 - 12/2018    |
| TAC        | Tacolneston                                          | United Kingdom            | NOAA    | 52.52° N             | 1.14° E                | 236                  | 06/2014 - 01/2016    |
| TAP        | Tae-ahn Peninsula                                    | Republic of Korea         | NOAA    | 36.73° N             | 126.13° E              | 21                   | 01/1998 - 12/2018    |
| THD        | Trinidad Head                                        | United States             | NOAA    | 41.05° N             | 124.15° W              | 112                  | 04/2002 - 06/2017    |
| TIK        | Hydrometeorological Observatory of Tiksi             | Russia                    | NOAA    | 71.60° N             | 128.89° E              | 29                   | 08/2011 - 09/2018    |
| USH        | Ushuaia                                              | Argentina                 | NOAA    | 54.85° S             | 68.31° W               | 32                   | 01/1998 - 12/2018    |
| UTA        | Wendover                                             | United States             | NOAA    | 39.90° N             | 113.72° W              | 1332                 | 01/1998 - 12/2018    |
| UUM        | Ulaan Uul                                            | Mongolia                  | NOAA    | 44.45° N             | 111.10° E              | 1012                 | 01/1998 - 12/2018    |
| WIS        | Weizmann Institute of Science at the Arava Institute | Israel                    | NOAA    | 30.86° N             | 34.78° E               | 482                  | 01/1998 - 12/2018    |
| WKT        | Moody                                                | United States             | NOAA    | 31.32° N             | 97.33° W               | 708                  | 02/2001 - 10/2010    |
| WLG        | Mt. Waliguan                                         | Peoples Republic of China | NOAA    | 36.27° N             | 100.92° E              | 3815                 | 01/1998 - 12/2018    |
| WPC        | Western Pacific Cruise                               | N/A                       | NOAA    | 30.67° S<br>32.46° N | 135.55° E<br>170.47° E | 8                    | 05/2004 - 06/2013    |
| <b>ZEP</b> | Ny-Alesund                                           | Norway and Sweden         | NOAA    | 78.91° N             | 11.89° E               | 479                  | 01/1998 - 12/2018    |

**Table S6.** List of  $\delta^{13}\text{C}(\text{CH}_4)$  surface in-situ observation sites that provided measurements assimilated in the inversion between 1998 and 2018. WPC is a mobile station. Its characteristics are compiled into a single line, providing latitude and longitude ranges of the measurements. Stations that retrieved samples consisting mainly of well-mixed MBL air are indicated in bold red.

| Site code  | Station name                                    | Country/Territory         | Network | Latitude | Longitude | Elevation (m a.s.l.) | Date range (MM/YYYY) |
|------------|-------------------------------------------------|---------------------------|---------|----------|-----------|----------------------|----------------------|
| <b>ALT</b> | Alert                                           | Canada                    | NOAA    | 82.45° N | 62.51° W  | 195                  | 08/2000 - 12/2017    |
| AMY        | Anmyeon-do                                      | Republic of Korea         | NOAA    | 36.54° N | 126.33° E | 125                  | 12/2013 - 12/2017    |
| <b>ASC</b> | Ascension Island                                | United Kingdom            | NOAA    | 7.97° S  | 14.40° W  | 90                   | 10/2000 - 12/2017    |
| <b>AZR</b> | Terceira Island                                 | Portugal                  | NOAA    | 38.75° N | 27.08° W  | 24                   | 08/2000 - 12/2017    |
| BAL        | Baltic Sea                                      | Poland                    | NOAA    | 55.35° N | 17.22° E  | 28                   | 04/2008 - 06/2011    |
| BHD        | Baring Head Station                             | New Zealand               | NOAA    | 41.41° S | 174.87° E | 90                   | 03/2009 - 11/2017    |
| <b>BRW</b> | Barrow Atmospheric Baseline Observatory         | United States             | NOAA    | 71.32° N | 156.60° W | 16                   | 01/1998 - 12/2017    |
| <b>CBA</b> | Cold Bay                                        | United States             | NOAA    | 55.20° N | 162.72° W | 25                   | 08/2000 - 12/2017    |
| <b>CGO</b> | Cape Grim                                       | Australia                 | NOAA    | 40.68° S | 144.68° E | 164                  | 01/1998 - 12/2017    |
| <b>KUM</b> | Cape Kumukahi                                   | United States             | NOAA    | 19.52° N | 154.82° W | 3                    | 01/1999 - 12/2017    |
| LLB        | Lac La Biche                                    | Canada                    | NOAA    | 54.95° N | 112.45° W | 546                  | 01/2008 - 02/2013    |
| MEX        | High Altitude Global Climate Observation Center | Mexico                    | NOAA    | 18.98° N | 97.31° W  | 4469                 | 01/2009 - 12/2017    |
| <b>MHD</b> | Mace Head                                       | Ireland                   | NOAA    | 53.33° N | 9.90° W   | 26                   | 01/1999 - 12/2017    |
| MLO        | Mauna Loa                                       | United States             | NOAA    | 19.53° N | 155.58° W | 3402                 | 01/1998 - 12/2017    |
| NWR        | Niwot Ridge                                     | United States             | NOAA    | 40.05° N | 105.58° W | 3526                 | 01/1998 - 12/2017    |
| <b>SMO</b> | Tutuila                                         | American Samoa            | NOAA    | 14.25° S | 170.57° W | 47                   | 01/1998 - 12/2017    |
| <b>SPO</b> | South Pole                                      | United States             | NOAA    | 89.98° S | 24.80° W  | 2815                 | 01/1998 - 12/2017    |
| SUM        | Summit                                          | Greenland                 | NOAA    | 72.60° N | 38.42° W  | 3214                 | 04/2010 - 12/2017    |
| TAP        | Tae-ahn Peninsula                               | Republic of Korea         | NOAA    | 36.73° N | 126.13° E | 21                   | 09/2000 - 12/2017    |
| WLG        | Mt. Waliguan                                    | Peoples Republic of China | NOAA    | 36.27° N | 100.92° E | 3815                 | 07/2001 - 12/2017    |
| WPC        | Western Pacific Cruise                          | N/A                       | NOAA    | 30.35° S | 167.73° E | 10                   | 11/2005 - 06/2013    |
| <b>ZEP</b> | Ny-Alesund                                      | Norway and Sweden         | NOAA    | 78.91° N | 11.89° E  | 479                  | 10/2001 - 12/2017    |

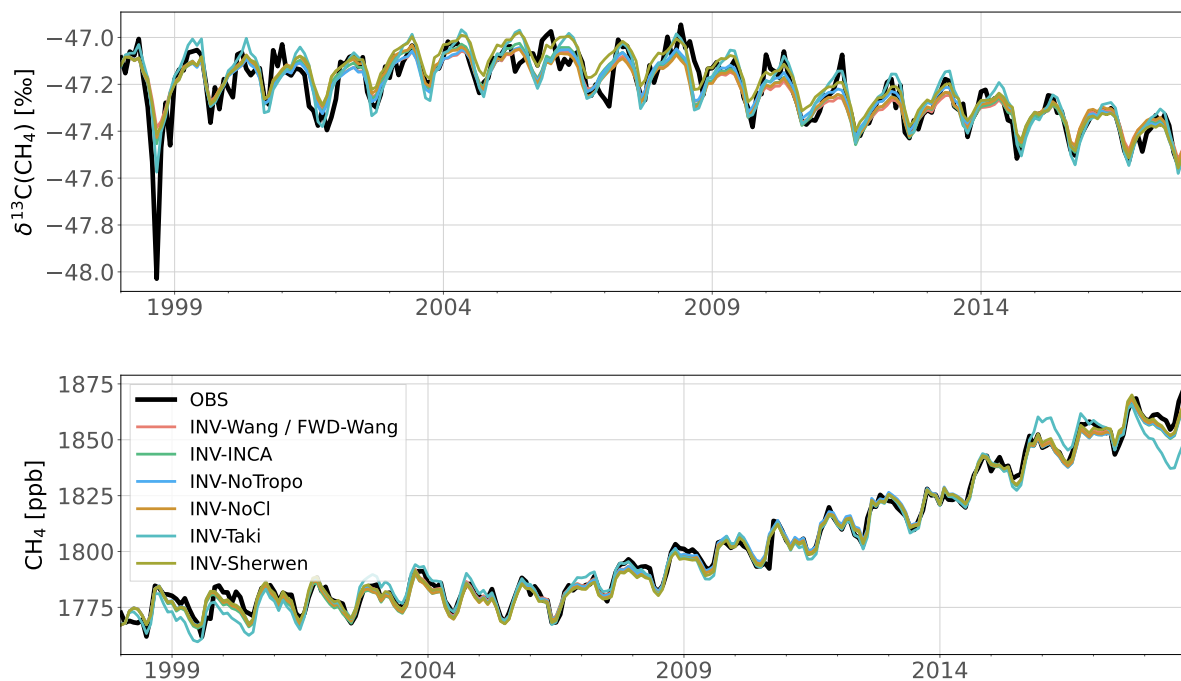

**Figure S1.** Time-series of observed and simulated  $\text{CH}_4$  and  $\delta^{13}\text{C}(\text{CH}_4)$  monthly values averaged over the globe using a latitudinal band average ( $30^\circ$ )

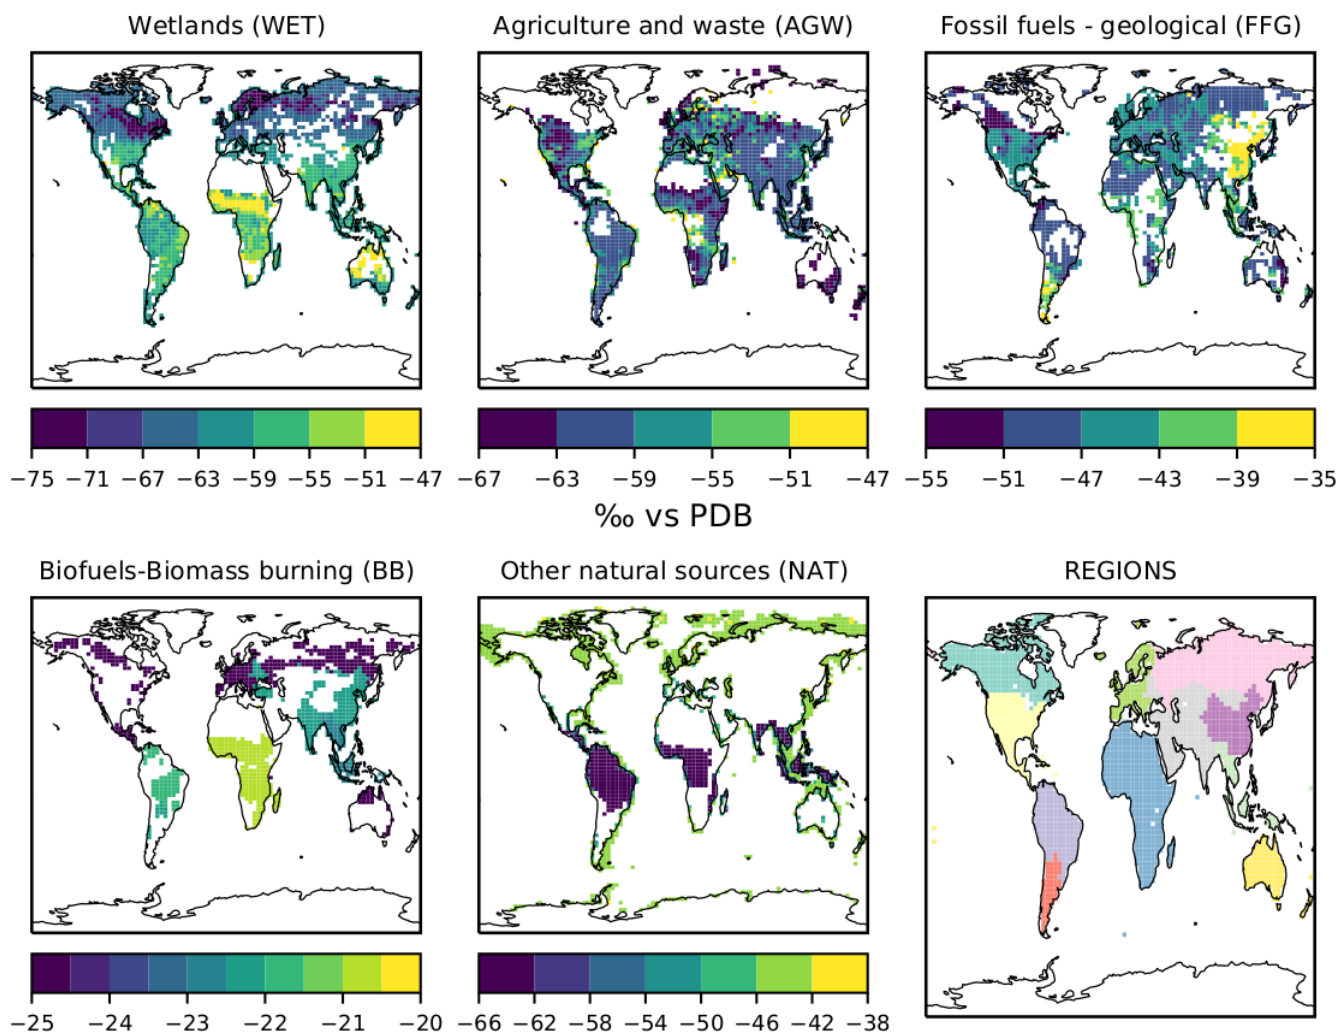

**Figure S2.** Prior estimates of  $\delta^{13}\text{C}(\text{CH}_4)_{\text{source}}$  isotopic signatures for each of the five emission categories averaged over the 1998-2018 period. The regions over which the values are optimized are shown in the lower-right panel. WET source signatures are dependent on the latitude, with more depleted values in boreal regions than in tropical regions. BB source signatures are dependent on the vegetation (C3/C4). Burning C4 vegetation tropical regions releases  $\text{CH}_4$  that is more  $^{13}\text{C}$ -enriched than  $\text{CH}_4$  released when burning C3 vegetation. AGW source signatures is dependent on the country/region and the C3 versus C4 livestock diet. FFG source signatures mainly depend both on the location and the contributions from coal, oil&gas and geological sources to the total FFG emissions of a specific country/region. For example, China  $^{13}\text{C}$ -enriched large coal emissions highly contributes to the FFG source signature in this region which is notably  $^{13}\text{C}$ -enriched compared to other regions.

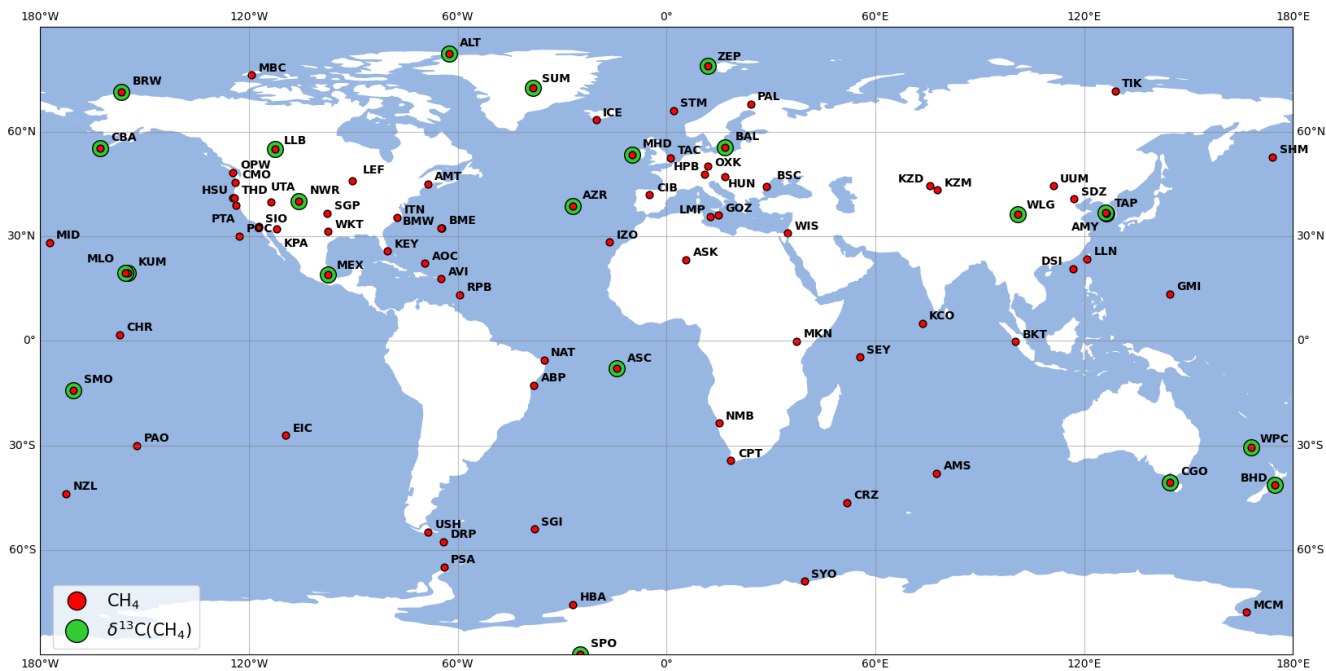

**Figure S3.** Locations of CH<sub>4</sub> and δ<sup>13</sup>C(CH<sub>4</sub>) surface stations. Affiliated networks are not displayed. More information about the stations can be found in Table S5 and Table S6.

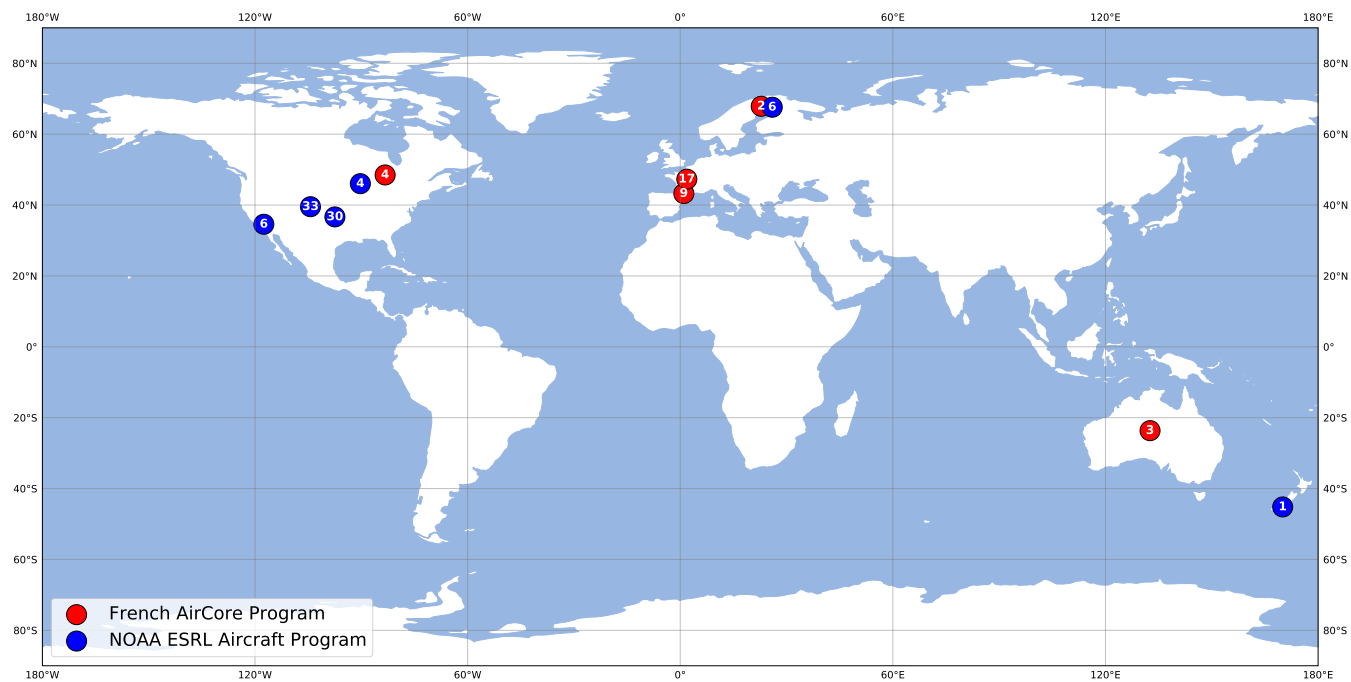

**Figure S4.** Locations and numbers of CH<sub>4</sub> vertical profiles retrieved using the AirCore technique. A comprehensive list of locations and associated providers can be found in Table S3.

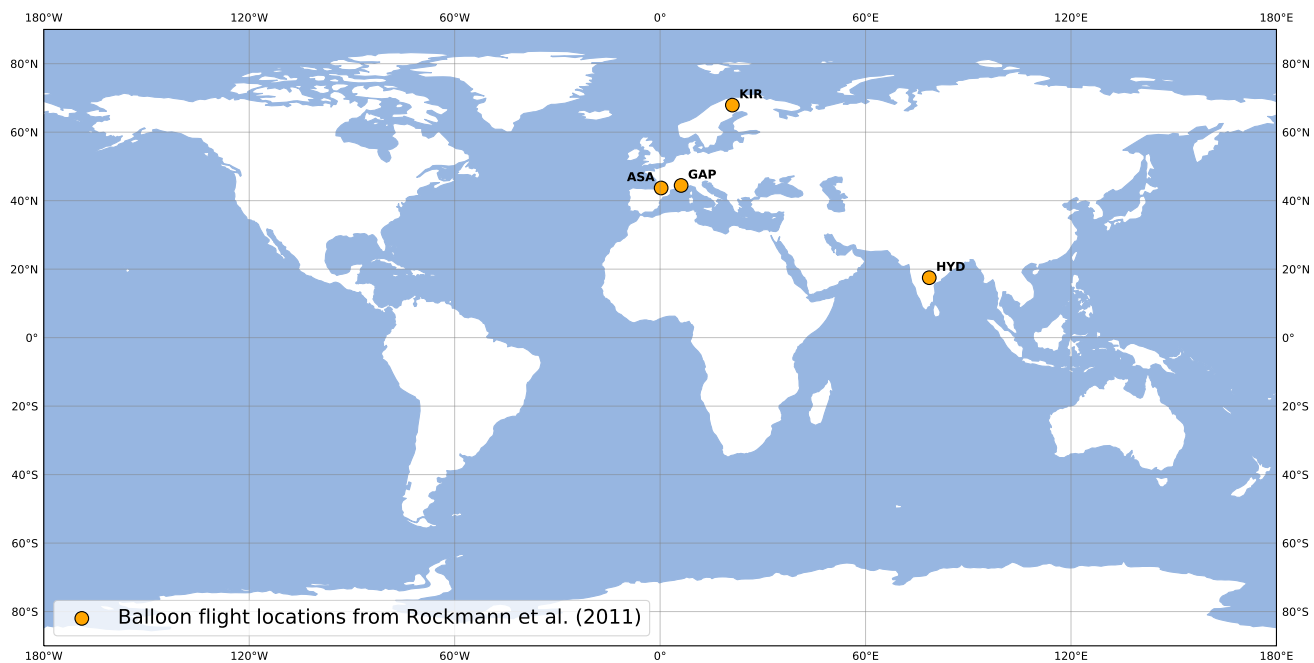

**Figure S5.** Locations and numbers of  $\delta^{13}\text{C}(\text{CH}_4)$  vertical profiles provided by Röckmann et al. (2011). A comprehensive list of locations can be found in Table S4.

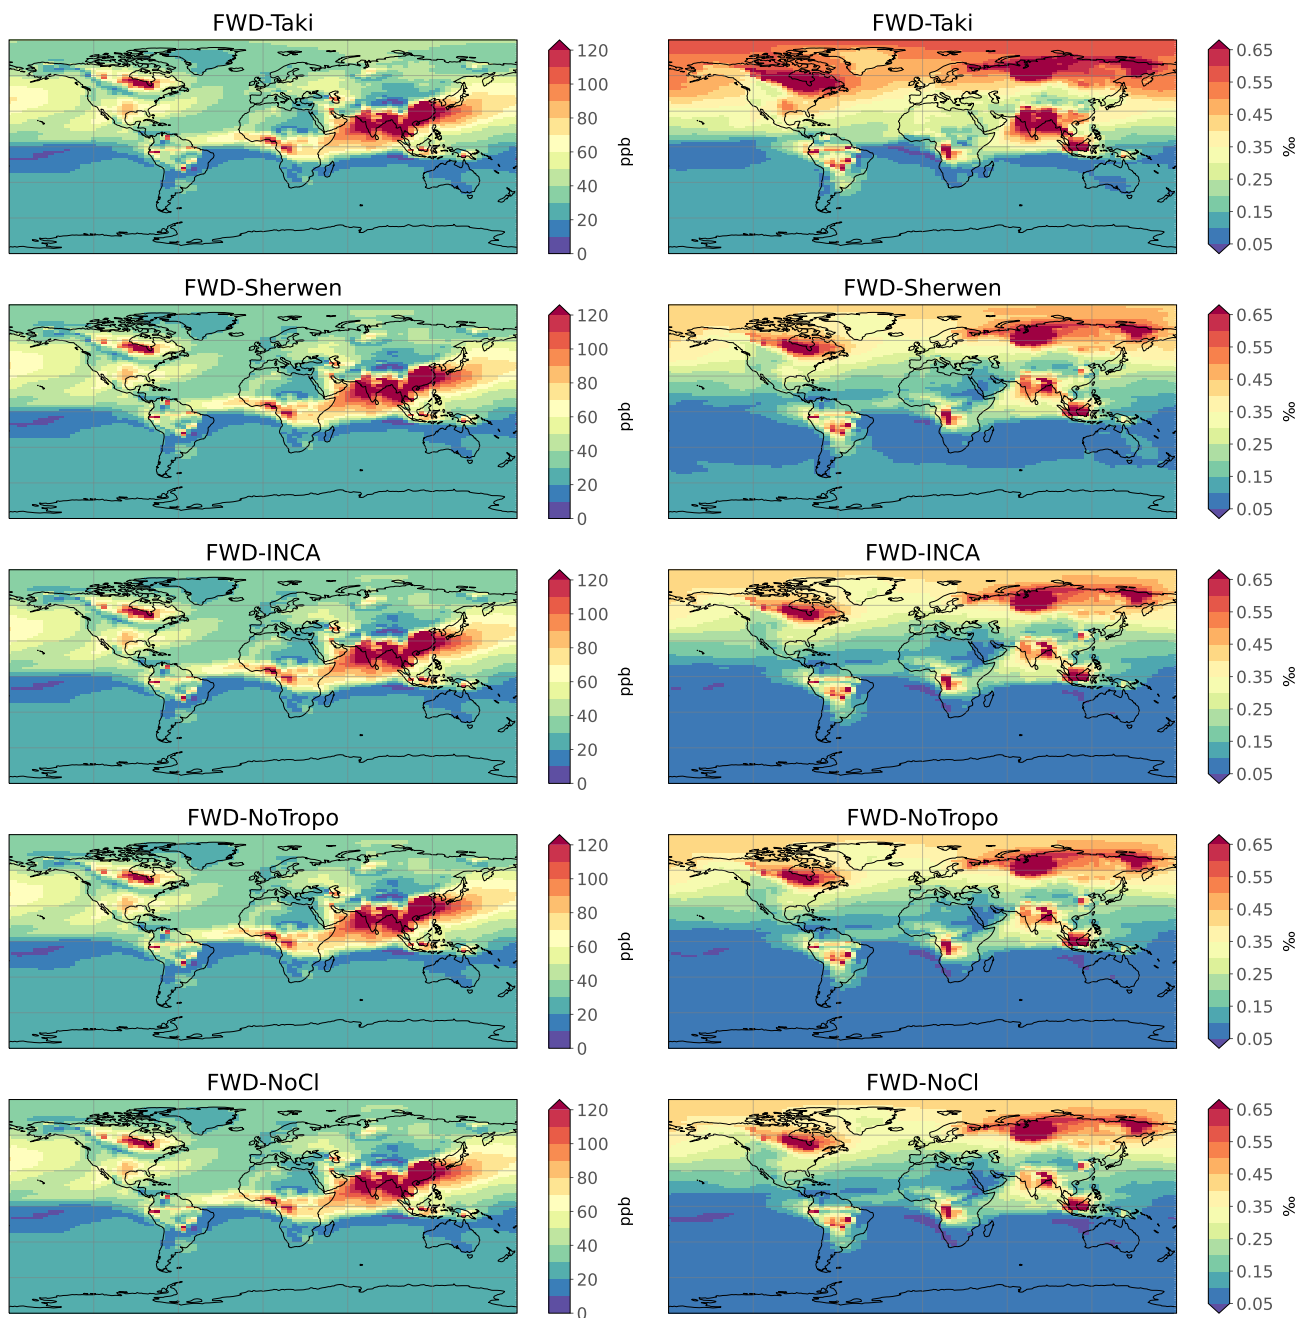

**Figure S6.** Mean seasonal cycles for multiple sensitivity tests averaged over 1998-2018. Left panels show the peak-to-peak amplitudes of the CH<sub>4</sub> seasonal cycle. Right panels show the peak-to-peak amplitudes of the δ<sup>13</sup>C(CH<sub>4</sub>) seasonal cycle. For clarity reasons and as all seasonal cycles are here very similar, the FWD-Wang seasonal cycle amplitudes are not displayed. Note that colour scales are identical for all simulations.



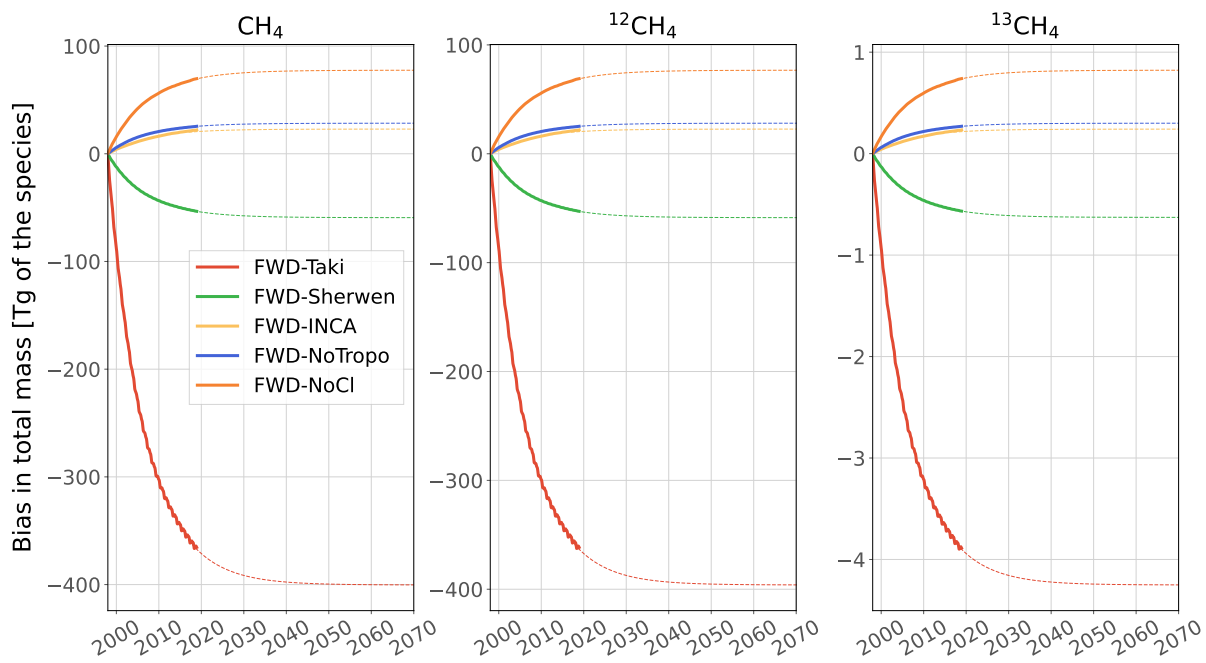

**Figure S7.** Biases in total atmospheric masses for  $\text{CH}_4$ ,  $^{12}\text{CH}_4$  and  $^{13}\text{CH}_4$  between FWD-\* and FWD-Wang. Solid lines correspond to the monthly simulated values. Dashed lines correspond to the extended values following the methods in Sect. S2.

## References

- 230 Berchet, A., Sollum, E., Thompson, R. L., Pison, I., Thanwerdas, J., Broquet, G., Chevallier, F., Aalto, T., Berchet, A., Bergamaschi, P., Brunner, D., Engelen, R., Fortems-Cheiney, A., Gerbig, C., Groot Zwaaftink, C. D., Haussaire, J.-M., Henne, S., Houweling, S., Karstens, U., Kutsch, W. L., Lujikx, I. T., Monteil, G., Palmer, P. I., van Peet, J. C. A., Peters, W., Peylin, P., Potier, E., Rödenbeck, C., Saunio, M., Scholze, M., Tsuruta, A., and Zhao, Y.: The Community Inversion Framework v1.0: a unified system for atmospheric inversion studies, *Geoscientific Model Development*, 14, 5331–5354, <https://doi.org/10.5194/gmd-14-5331-2021>, 2021.
- 235 Bergamaschi, P., Lubina, C., Königstedt, R., Fischer, H., Veltkamp, A. C., and Zwaagstra, O.: Stable isotopic signatures ( $\delta^{13}\text{C}$ ,  $\delta\text{D}$ ) of methane from European landfill sites, *Journal of Geophysical Research: Atmospheres*, 103, 8251–8265, <https://doi.org/10.1029/98JD00105>, 1998.
- Bousquet, P., Ciais, P., Miller, J. B., Dlugokencky, E. J., Hauglustaine, D. A., Prigent, C., Van der Werf, G. R., Peylin, P., Brunke, E.-G., Carouge, C., Langenfelds, R. L., Lathière, J., Papa, F., Ramonet, M., Schmidt, M., Steele, L. P., Tyler, S. C., and White, J.: Contribution of  
240 anthropogenic and natural sources to atmospheric methane variability, *Nature*, 443, 439–443, <https://doi.org/10.1038/nature05132>, 2006.
- Bréas, O., Guillou, C., Reniero, F., and Wada, E.: The Global Methane Cycle: Isotopes and Mixing Ratios, *Sources and Sinks, Isotopes in Environmental and Health Studies*, 37, 257–379, <https://doi.org/10.1080/10256010108033302>, 2001.
- Chang, J., Peng, S., Ciais, P., Saunio, M., Dangal, S. R. S., Herrero, M., Havlík, P., Tian, H., and Bousquet, P.: Revisiting enteric methane emissions from domestic ruminants and their  $\delta^{13}\text{C}_{\text{CH}_4}$  source signature, *Nature Communications*, 10, 3420,  
245 <https://doi.org/10.1038/s41467-019-11066-3>, 2019.
- Chanton, J. P., Rutkowski, C. M., and Mosher, B.: Quantifying Methane Oxidation from Landfills Using Stable Isotope Analysis of Downwind Plumes, *Environmental Science & Technology*, 33, 3755–3760, <https://doi.org/10.1021/es9904033>, 1999.
- Chanton, J. P., Rutkowski, C. M., Schwartz, C. C., Ward, D. E., and Boring, L.: Factors influencing the stable carbon isotopic signature of methane from combustion and biomass burning, *Journal of Geophysical Research: Atmospheres*, 105, 1867–1877,  
250 <https://doi.org/10.1029/1999JD900909>, 2000.
- Cressot, C., Chevallier, F., Bousquet, P., Crevoisier, C., Dlugokencky, E. J., Fortems-Cheiney, A., Frankenberg, C., Parker, R., Pison, I., Scheepmaker, R. A., Montzka, S. A., Krummel, P. B., Steele, L. P., and Langenfelds, R. L.: On the consistency between global and regional methane emissions inferred from SCIAMACHY, TANSO-FTS, IASI and surface measurements, *Atmospheric Chemistry and Physics*, 14, 577–592, <https://doi.org/10.5194/acp-14-577-2014>, 2014.
- 255 Etiope, G.: *Natural Gas Seepage: The Earth's Hydrocarbon Degassing*, Springer International Publishing, [www.springer.com/gp/book/9783319146003](http://www.springer.com/gp/book/9783319146003), 2015.
- Etiope, G., Ciotoli, G., Schwietzke, S., and Schoell, M.: Gridded maps of geological methane emissions and their isotopic signature, <https://doi.org/10.5194/essd-11-1-2019>, 2019.
- Feinberg, A. I., Coulon, A., Stenke, A., Schwietzke, S., and Peter, T.: Isotopic source signatures: Impact of regional variability on the  
260  $\delta^{13}\text{C}(\text{CH}_4)$  trend and spatial distribution, *Atmospheric Environment*, 174, 99–111, <https://doi.org/10.1016/j.atmosenv.2017.11.037>, 2018.
- Ganesan, A. L., Stell, A. C., Gedney, N., Comyn-Platt, E., Hayman, G., Rigby, M., Poulter, B., and Hornibrook, E. R. C.: Spatially Resolved Isotopic Source Signatures of Wetland Methane Emissions, *Geophysical Research Letters*, 45, 3737–3745, <https://doi.org/10.1002/2018GL077536>, 2018.
- Gilbert, J. C. and Lemaréchal, C.: Some numerical experiments with variable-storage quasi-Newton algorithms, *Mathematical Programming*,  
265 45, 407–435, <https://doi.org/10.1007/BF01589113>, 1989.

- Hauglustaine, D. A., Hourdin, F., Jourdain, L., Filiberti, M.-A., Walters, S., Lamarque, J.-F., and Holland, E. A.: Interactive chemistry in the Laboratoire de Météorologie Dynamique general circulation model: Description and background tropospheric chemistry evaluation, *Journal of Geophysical Research: Atmospheres*, 109, <https://doi.org/10.1029/2003JD003957>, 2004.
- 270 Holmes, M. E., Sansone, F. J., Rust, T. M., and Popp, B. N.: Methane production, consumption, and air-sea exchange in the open ocean: An Evaluation based on carbon isotopic ratios, *Global Biogeochemical Cycles*, 14, 1–10, <https://doi.org/10.1029/1999GB001209>, 2000.
- Ide, K., Courtier, P., Ghil, M., and Lorenc, A. C.: Unified Notation for Data Assimilation : Operational, Sequential and Variational (gtSpecial IssueltData Assimilation in Meteorology and Oceanography: Theory and Practice), *Journal of the Meteorological Society of Japan. Ser. II*, 75, 181–189, [https://doi.org/10.2151/jmsj1965.75.1B\\_181](https://doi.org/10.2151/jmsj1965.75.1B_181), 1997.
- 275 Janssens-Maenhout, G., Crippa, M., Guizzardi, D., Muntean, M., Schaaf, E., Dentener, F., Bergamaschi, P., Pagliari, V., Olivier, J. G. J., Peters, J. A. H. W., van Aardenne, J. A., Monni, S., Doering, U., Petrescu, A. M. R., Solazzo, E., and Oreggioni, G. D.: EDGAR v4.3.2 Global Atlas of the three major greenhouse gas emissions for the period 1970–2012, *Earth System Science Data*, 11, 959–1002, <https://doi.org/10.5194/essd-11-959-2019>, 2019.
- 280 Kirschke, S., Bousquet, P., Ciais, P., Saunois, M., Canadell, J. G., Dlugokencky, E. J., Bergamaschi, P., Bergmann, D., Blake, D. R., Bruhwiler, L., Cameron-Smith, P., Castaldi, S., Chevallier, F., Feng, L., Fraser, A., Heimann, M., Hodson, E. L., Houweling, S., Josse, B., Fraser, P. J., Krummel, P. B., Lamarque, J.-F., Langenfelds, R. L., Le Quééré, C., Naik, V., O’Doherty, S., Palmer, P. I., Pison, I., Plummer, D., Poulter, B., Prinn, R. G., Rigby, M., Ringeval, B., Santini, M., Schmidt, M., Shindell, D. T., Simpson, I. J., Spahni, R., Steele, L. P., Strode, S. A., Sudo, K., Szopa, S., van der Werf, G. R., Voulgarakis, A., van Weele, M., Weiss, R. F., Williams, J. E., and Zeng, G.: Three decades of global methane sources and sinks, *Nature Geoscience*, 6, 813–823, <https://doi.org/10.1038/ngeo1955>, 2013.
- 285 Klevenhusen, F., Bernasconi, S. M., Kreuzer, M., and Soliva, C. R.: Experimental validation of the Intergovernmental Panel on Climate Change default values for ruminant-derived methane and its carbon-isotope signature, *Animal Production Science*, 50, 159, <https://doi.org/10.1071/AN09112>, 2010.
- Lambert, G. and Schmidt, S.: Reevaluation of the oceanic flux of methane: Uncertainties and long term variations, *Chemosphere*, 26, 579–589, [https://doi.org/10.1016/0045-6535\(93\)90443-9](https://doi.org/10.1016/0045-6535(93)90443-9), 1993.
- 290 Levin, I., Bergamaschi, P., Dörr, H., and Trapp, D.: Stable isotopic signature of methane from major sources in Germany, *Chemosphere*, 26, 161–177, [https://doi.org/10.1016/0045-6535\(93\)90419-6](https://doi.org/10.1016/0045-6535(93)90419-6), 1993.
- Locatelli, R., Bousquet, P., Chevallier, F., Fortems-Cheney, A., Szopa, S., Saunois, M., Agusti-Panareda, A., Bergmann, D., Bian, H., Cameron-Smith, P., Chipperfield, M. P., Gloor, E., Houweling, S., Kawa, S. R., Krol, M., Patra, P. K., Prinn, R. G., Rigby, M., Saito, R., and Wilson, C.: Impact of transport model errors on the global and regional methane emissions estimated by inverse modelling, *Atmospheric Chemistry and Physics*, 13, 9917–9937, <https://doi.org/doi.org/10.5194/acp-13-9917-2013>, 2013.
- 295 Locatelli, R., Bousquet, P., Saunois, M., Chevallier, F., and Cressot, C.: Sensitivity of the recent methane budget to LMDz sub-grid-scale physical parameterizations, *Atmospheric Chemistry and Physics*, 15, 9765–9780, <https://doi.org/10.5194/acp-15-9765-2015>, 2015.
- Masarie, K. A. and Tans, P. P.: Extension and integration of atmospheric carbon dioxide data into a globally consistent measurement record, *Journal of Geophysical Research: Atmospheres*, 100, 11 593–11 610, <https://doi.org/10.1029/95JD00859>, 1995.
- 300 Patra, P. K., Krol, M. C., Montzka, S. A., Arnold, T., Atlas, E. L., Lintner, B. R., Stephens, B. B., Xiang, B., Elkins, J. W., Fraser, P. J., Ghosh, A., Hints, E. J., Hurst, D. F., Ishijima, K., Krummel, P. B., Miller, B. R., Miyazaki, K., Moore, F. L., Mühle, J., O’Doherty, S., Prinn, R. G., Steele, L. P., Takigawa, M., Wang, H. J., Weiss, R. F., Wofsy, S. C., and Young, D.: Observational evidence for interhemispheric hydroxyl-radical parity, *Nature*, 513, 219–223, <https://doi.org/10.1038/nature13721>, 2014.

- Poulter, B., Bousquet, P., Canadell, J. G., Ciais, P., Pregon, A., Saunois, M., Arora, V. K., Beerling, D. J., Brovkin, V., Jones, C. D., Joos, F., Gedney, N., Ito, A., Kleinen, T., Koven, C. D., McDonald, K., Melton, J. R., Peng, C., Peng, S., Prigent, C., Schroeder, R., Riley, W. J., Saito, M., Spahni, R., Tian, H., Taylor, L., Viovy, N., Wilton, D., Wiltshire, A., Xu, X., Zhang, B., Zhang, Z., and Zhu, Q.: Global wetland contribution to 2000–2012 atmospheric methane growth rate dynamics, *Environmental Research Letters*, 12, 094013, <https://doi.org/10.1088/1748-9326/aa8391>, 2017.
- Prather, M. J., Holmes, C. D., and Hsu, J.: Reactive greenhouse gas scenarios: Systematic exploration of uncertainties and the role of atmospheric chemistry: *ATMOSPHERIC CHEMISTRY AND GREENHOUSE GASES*, *Geophysical Research Letters*, 39, n/a–n/a, <https://doi.org/10.1029/2012GL051440>, 2012.
- Quay, P., Stutsman, J., Wilbur, D., Snover, A., Dlugokencky, E., and Brown, T.: The isotopic composition of atmospheric methane, *Global Biogeochemical Cycles*, 13, 445–461, <https://doi.org/10.1029/1998GB900006>, 1999.
- Rayner, P. J., Michalak, A. M., and Chevallier, F.: Fundamentals of data assimilation applied to biogeochemistry, *Atmospheric Chemistry and Physics*, 19, 13911–13932, <https://doi.org/10.5194/acp-19-13911-2019>, 2019.
- Rodenbeck, C., Houweling, S., Gloor, M., and Heimann, M.: CO<sub>2</sub> flux history 1982–2001 inferred from atmospheric data using a global inversion of atmospheric transport, *Atmos. Chem. Phys.*, p. 46, 2003.
- Röckmann, T., Brass, M., Borchers, R., and Engel, A.: The isotopic composition of methane in the stratosphere: high-altitude balloon sample measurements, *Atmospheric Chemistry and Physics*, 11, 13287–13304, <https://doi.org/10.5194/acp-11-13287-2011>, 2011.
- Sansone, F. J., Popp, B. N., Gasc, A., Graham, A. W., and Rust, T. M.: Highly elevated methane in the eastern tropical North Pacific and associated isotopically enriched fluxes to the atmosphere, *Geophysical Research Letters*, 28, 4567–4570, <https://doi.org/10.1029/2001GL013460>, 2001.
- Saunois, M., Stavert, A. R., Poulter, B., Bousquet, P., Canadell, J. G., Jackson, R. B., Raymond, P. A., Dlugokencky, E. J., Houweling, S., Patra, P. K., Ciais, P., Arora, V. K., Bastviken, D., Bergamaschi, P., Blake, D. R., Brailsford, G., Bruhwiler, L., Carlson, K. M., Carrol, M., Castaldi, S., Chandra, N., Crevoisier, C., Crill, P. M., Covey, K., Curry, C. L., Etiope, G., Frankenberg, C., Gedney, N., Hegglin, M. I., Höglund-Isaksson, L., Hugelius, G., Ishizawa, M., Ito, A., Janssens-Maenhout, G., Jensen, K. M., Joos, F., Kleinen, T., Krummel, P. B., Langenfelds, R. L., Laruelle, G. G., Liu, L., Machida, T., Maksyutov, S., McDonald, K. C., McNorton, J., Miller, P. A., Melton, J. R., Morino, I., Müller, J., Murguía-Flores, F., Naik, V., Niwa, Y., Noce, S., O’Doherty, S., Parker, R. J., Peng, C., Peng, S., Peters, G. P., Prigent, C., Prinn, R., Ramonet, M., Regnier, P., Riley, W. J., Rosentretter, J. A., Segers, A., Simpson, I. J., Shi, H., Smith, S. J., Steele, L. P., Thornton, B. F., Tian, H., Tohjima, Y., Tubiello, F. N., Tsuruta, A., Viovy, N., Voulgarakis, A., Weber, T. S., van Weele, M., van der Werf, G. R., Weiss, R. F., Worthy, D., Wunch, D., Yin, Y., Yoshida, Y., Zhang, W., Zhang, Z., Zhao, Y., Zheng, B., Zhu, Q., Zhu, Q., and Zhuang, Q.: The Global Methane Budget 2000–2017, *Earth System Science Data*, 12, 1561–1623, <https://doi.org/10.5194/essd-12-1561-2020>, 2020.
- Schwietzke, S., Sherwood, O. A., Bruhwiler, L. M. P., Miller, J. B., Etiope, G., Dlugokencky, E. J., Michel, S. E., Arling, V. A., Vaughn, B. H., White, J. W. C., and Tans, P. P.: Upward revision of global fossil fuel methane emissions based on isotope database, *Nature*, 538, 88–91, <https://doi.org/10.1038/nature19797>, 2016.
- Sherwood, O. A., Schwietzke, S., Arling, V. A., and Etiope, G.: Global Inventory of Gas Geochemistry Data from Fossil Fuel, Microbial and Burning Sources, version 2017, *Earth System Science Data*, 9, 639–656, <https://doi.org/10.5194/essd-9-639-2017>, 2017.
- Tans, P. P.: A note on isotopic ratios and the global atmospheric methane budget, *Global Biogeochemical Cycles*, 11, 77–81, <https://doi.org/10.1029/96GB03940>, 1997.

- 340 Thanwerdas, J., Saunio, M., Berchet, A., Pison, I., Vaughn, B. H., Michel, S. E., and Bousquet, P.: Variational inverse modeling within the Community Inversion Framework v1.1 to assimilate  $\delta^{13}\text{C}(\text{CH}_4)$  and  $\text{CH}_4$ : a case study with model LMDz-SACS, *Geoscientific Model Development*, 15, 4831–4851, <https://doi.org/10.5194/gmd-15-4831-2022>, 2022.
- Thompson, R. L., Nisbet, E. G., Pisso, I., Stohl, A., Blake, D., Dlugokencky, E. J., Helmig, D., and White, J. W. C.: Variability in Atmospheric Methane From Fossil Fuel and Microbial Sources Over the Last Three Decades, *Geophysical Research Letters*, 45, 11,499–11,508, <https://doi.org/10.1029/2018GL078127>, 2018.
- 345 Townsend-Small, A., Tyler, S. C., Pataki, D. E., Xu, X., and Christensen, L. E.: Isotopic measurements of atmospheric methane in Los Angeles, California, USA: Influence of “fugitive” fossil fuel emissions, *Journal of Geophysical Research: Atmospheres*, 117, <https://doi.org/10.1029/2011JD016826>, 2012.
- Umezawa, T., Brenninkmeijer, C. A. M., Röckmann, T., van der Veen, C., Tyler, S. C., Fujita, R., Morimoto, S., Aoki, S., Sowers, T., Schmitt, J., Bock, M., Beck, J., Fischer, H., Michel, S. E., Vaughn, B. H., Miller, J. B., White, J. W. C., Brailsford, G., Schaefer, H., Sperlich, P., Brand, W. A., Rothe, M., Blunier, T., Lowry, D., Fisher, R. E., Nisbet, E. G., Rice, A. L., Bergamaschi, P., Veidt, C., and Levin, I.: Interlaboratory comparison of  $\delta^{13}\text{C}$  and  $\delta\text{D}$  measurements of atmospheric  $\text{CH}_4$  for combined use of data sets from different laboratories, *Atmospheric Measurement Techniques*, 11, 1207–1231, <https://doi.org/10.5194/amt-11-1207-2018>, 2018.
- van der Werf, G. R., Randerson, J. T., Giglio, L., van Leeuwen, T. T., Chen, Y., Rogers, B. M., Mu, M., van Marle, M. J. E., Morton, D. C., Collatz, G. J., Yokelson, R. J., and Kasibhatla, P. S.: Global fire emissions estimates during 1997–2016, *Earth System Science Data*, 9, 697–720, <https://doi.org/10.5194/essd-9-697-2017>, 2017.
- 355 Voulgarakis, A., Naik, V., Lamarque, J.-F., Shindell, D. T., Young, P. J., Prather, M. J., Wild, O., Field, R. D., Bergmann, D., Cameron-Smith, P., Cionni, I., Collins, W. J., Dalsøren, S. B., Doherty, R. M., Eyring, V., Faluvegi, G., Folberth, G. A., Horowitz, L. W., Josse, B., MacKenzie, I. A., Nagashima, T., Plummer, D. A., Righi, M., Rumbold, S. T., Stevenson, D. S., Strode, S. A., Sudo, K., Szopa, S., and Zeng, G.: Analysis of present day and future OH and methane lifetime in the ACCMIP simulations, *Atmospheric Chemistry and Physics*, 13, 2563–2587, <https://doi.org/10.5194/acp-13-2563-2013>, 2013.
- Warwick, N. J., Cain, M. L., Fisher, R., France, J. L., Lowry, D., Michel, S. E., Nisbet, E. G., Vaughn, B. H., White, J. W. C., and Pyle, J. A.: Using  $\delta^{13}\text{C}-\text{CH}_4$  and  $\delta\text{D}-\text{CH}_4$  to constrain Arctic methane emissions, *Atmospheric Chemistry and Physics*, 16, 14 891–14 908, <https://doi.org/10.5194/acp-16-14891-2016>, 2016.
- 365 Yver, C. E., Pison, I. C., Fortems-Cheiney, A., Schmidt, M., Chevallier, F., Ramonet, M., Jordan, A., Søvde, O. A., Engel, A., Fisher, R. E., Lowry, D., Nisbet, E. G., Levin, I., Hammer, S., Necki, J., Bartyzel, J., Reimann, S., Vollmer, M. K., Steinbacher, M., Aalto, T., Maione, M., Arduini, J., O’Doherty, S., Grant, A., Sturges, W. T., Forster, G. L., Lunder, C. R., Privalov, V., Paramonova, N., Werner, A., and Bousquet, P.: A new estimation of the recent tropospheric molecular hydrogen budget using atmospheric observations and variational inversion, *Atmospheric Chemistry and Physics*, 11, 3375–3392, <https://doi.org/10.5194/acp-11-3375-2011>, 2011.
- 370 Zazzeri, G., Lowry, D., Fisher, R. E., France, J. L., Lanoisellé, M., Kelly, B. F. J., Necki, J. M., Iverach, C. P., Ginty, E., Zimnoch, M., Jasek, A., and Nisbet, E. G.: Carbon isotopic signature of coal-derived methane emissions to the atmosphere: from coalification to alteration, *Atmospheric Chemistry and Physics*, 16, 13 669–13 680, <https://doi.org/10.5194/acp-16-13669-2016>, 2016.
- Zhao, Y., Saunio, M., Bousquet, P., Lin, X., Berchet, A., Hegglin, M. I., Canadell, J. G., Jackson, R. B., Hauglustaine, D. A., Szopa, S., Stavert, A. R., Abraham, N. L., Archibald, A. T., Bekki, S., Deushi, M., Jöckel, P., Josse, B., Kinnison, D., Kirner, O., Marécal, V., O’Connor, F. M., Plummer, D. A., Revell, L. E., Rozanov, E., Stenke, A., Strode, S., Tilmes, S., Dlugokencky, E. J., and Zheng, B.: Inter-model comparison of global hydroxyl radical (OH) distributions and their impact on atmospheric methane over the 2000–2016 period, *Atmospheric Chemistry and Physics*, 19, 13 701–13 723, <https://doi.org/10.5194/acp-19-13701-2019>, 2019.
